# Supplementary material
Source: publisher site journal article supplement (https://www.dovepress.com/article/404580)
Supplement: Supplementary file 1 [file get_supplementary_file.php]

**An explainable machine learning model to predict acute kidney injury after cardiac surgery: a retrospective cohort study**

**Supplementary Material**

**Methods**

**Xgboost**

XGBoost is an optimized distributed gradient boosting library designed for efficient and scalable training of machine learning models. It is an ensemble learning method that combines the predictions of multiple weak models to produce a stronger prediction. XGBoost stands for “Extreme Gradient Boosting” and it has become one of the most popular and widely used machine learning algorithms due to its ability to handle large datasets and its ability to achieve state-of-the-art performance in many machine learning tasks such as classification and regression. XGBoost can be used in a variety of applications, including Kaggle competitions, recommendation systems, and click-through rate prediction, among others. It is also highly customizable and allows for fine-tuning of various model parameters to optimize performance.

| Table S1. Details of missing values | |
| --- | --- |
| Variable names | Percent (%) |
| BMI | 0.3% (43) |
| Smoker | 2.1% (341) |
| NYHA | 1.2% (189) |
| Heart failure | 5.2% (822) |
| LVEF | 0.1% (17) |
| Anemia | < 0.1% (2) |
| LVRWT | 10.1% (1604) |
| Preoperative NT-proBNP | 14.3% (2272) |
| Glu | 0.6% (101) |
| Albumin | 0.2% (39) |
| Hs-CRP | 6.0% (953) |
| AST | 0.1% (22) |
| ALP | 0.1% (22) |
| TBil | 1.9% (299) |
| Na | < 0.1% (2) |
| Cl | < 0.1% (2) |
| LDL-C | 6.0% (950) |
| TG | 6.0% (950) |
| Apolipoprotein A1 | 6.3% (994) |
| WBC | < 0.1% (1) |
| PLT | < 0.1% (1) |
| Postoperative NT-proBNP | 4.3% (679) |
| BMI, body mass index; NYHA, New York Heart Association; LVEF, left ventricular ejection fraction; NT-proBNP, N-terminal pro-B-type natriuretic peptide; Glu, glucose; HsCRP, hypersensitive C reactive protein; AST, aspartate aminotransferase; ALP, alkaline phosphatase; TBil, total bilirubin; LDL-C, low-density lipoprotein-cholesterol; TG, triglyceride; WBC, white blood cell; PLT, platelet; | |

| Table S2. Hyperparameters and optimal result | | | |
| --- | --- | --- | --- |
| Model | Hyperparameter | Description | Optimal |
| Xgboost | nrouds | Total number of boosted trees | 464 |
|  | max_depth | Max depth per tree | 5 |
|  | eta | Learning rate | 0.01561834 |
|  | gamma | Min loss reduction to create new tree split | 0.9718064 |
|  | colsample_bytree | % Features used per tree | 0.5321122 |
|  | min_child_weight | Minimum sum of instance weight (hessian) needed in a child | 17 |
|  | subsample | % Samples used per tree | 0.7380101 |

| Table S3. Variance inflation factor of the LR model | |
| --- | --- |
| Variable names | VIF |
| Sex | 2.441 |
| Age | 1.975 |
| Smoker | 1.111 |
| Hypertension | 1.274 |
| Diabetes | 1.325 |
| Cerebrovascular disease | 1.133 |
| Previous heart surgery | 1.077 |
| Chronic kidney disease | 1.540 |
| Atrial fibrillation | 1.376 |
| Infective endocarditis | 1.047 |
| LVEF | 1.321 |
| Anemia | 1.214 |
| Albumin | 1.427 |
| Hs-CRP | 1.274 |
| AST | 1.058 |
| ALP | 1.143 |
| TBil | 1.268 |
| Na | 1.704 |
| Cl | 1.885 |
| Ca | 1.515 |
| Apolipoprotein A1 | 1.379 |
| TG | 1.138 |
| PLT | 1.253 |
| CPB or not | 2.650 |
| CPB time | 3.020 |
| Operation time | 1.597 |
| RBC use | 1.280 |
| Plasma use | 1.184 |
| Corticosteroids | 1.022 |
| Levosimendan | 1.134 |
| eGFR ICU arrival | 3.525 |
| Creatinine ICU arrival | 5.035 |
| Postoperative NT-proBNP | 1.224 |
|  | |


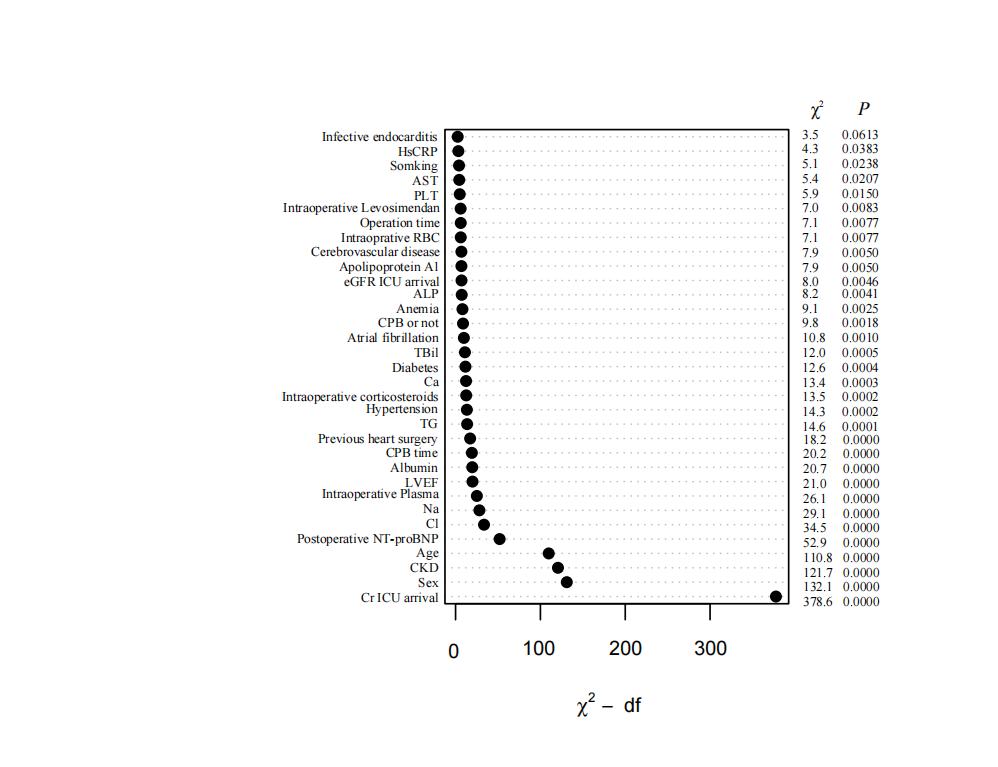


Figure legend

Figure S1. The variable contribution of logistic regression model in predicting AKI.
